# Supplementary material for: One-pot synthesis of flowerlike Ni7S6and its application in selective hydrogenation of chloronitrobenzene
Source: Royal Society of Chemistry journal article supplement (doi:10.1039/b916866d), 2009-12-24

## Supplementary Information

# One-pot Synthesis of Flowerlike Ni<sub>7</sub>S<sub>6</sub> and its Application in Selective Hydrogenation of Chloronitrobenzene

Feng Cao,<sup>ab</sup> Ruixia Liu,<sup>ab</sup> Liang Zhou,<sup>ab</sup> Shuyan Song,<sup>ab</sup> Yongqian Lei,<sup>ab</sup> Weidong Shi,<sup>ab</sup> Fengyu Zhao,<sup>ab</sup> and Hongjie Zhang\*<sup>ab</sup>

Supplementary information comprising: (1) SEM images of samples obtained using (a) ethylenediamine; (b) Triethanolmine (TEA) and (c) n-Butylamine. In these cases, samples were prepared at 180°C, H<sub>2</sub>O/EA volume ratios =4:1, and a reaction time of 12 h, Fig. S1; (2) XRD patterns of the products: microspheres, nanoplates, urchins, Fig. S2-3; and (3) SEM images of the samples prepared under different Ni/S molar ratios: (a) 1:1; (b) 1:2; In all cases, samples were prepared at 180°C, and a reaction time of 12 h, Fig. S4;

**Fig. S1** SEM images of samples obtained using (a) ethylenediamine; (b) Triethanolmine (TEA) and (c) n-Butylamine. In these cases, samples were prepared at 180°C, H<sub>2</sub>O/EA volume ratios =4:1, and a reaction time of 12 h.

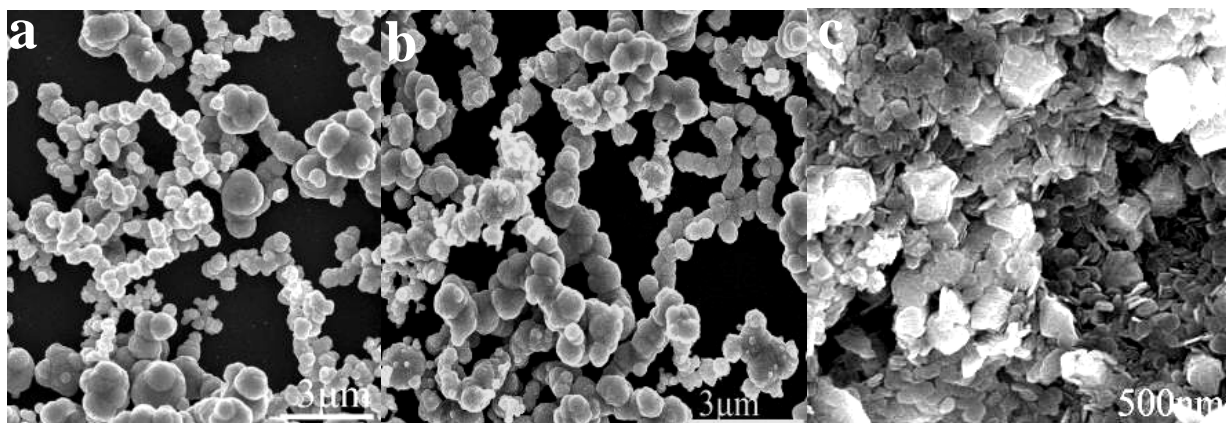

Fig. S2 XRD patterns of the products: (a) microspheres, and (b) nanoplates.

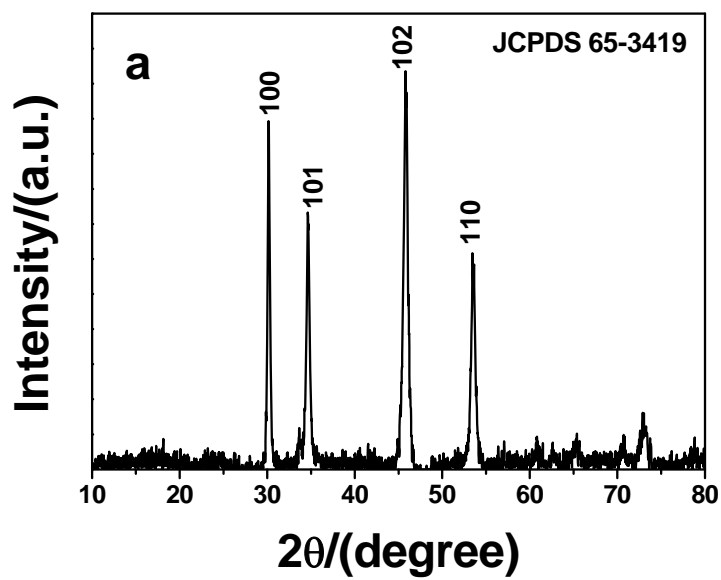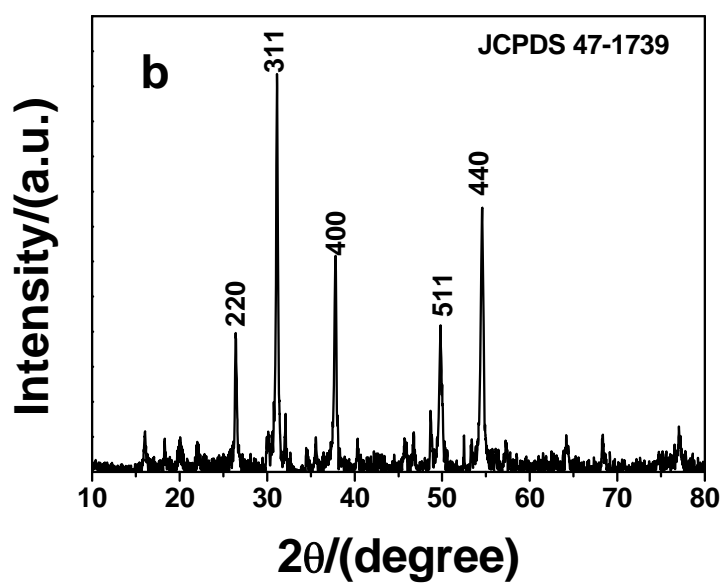

Fig. S3 XRD pattern of the urchin-like product.

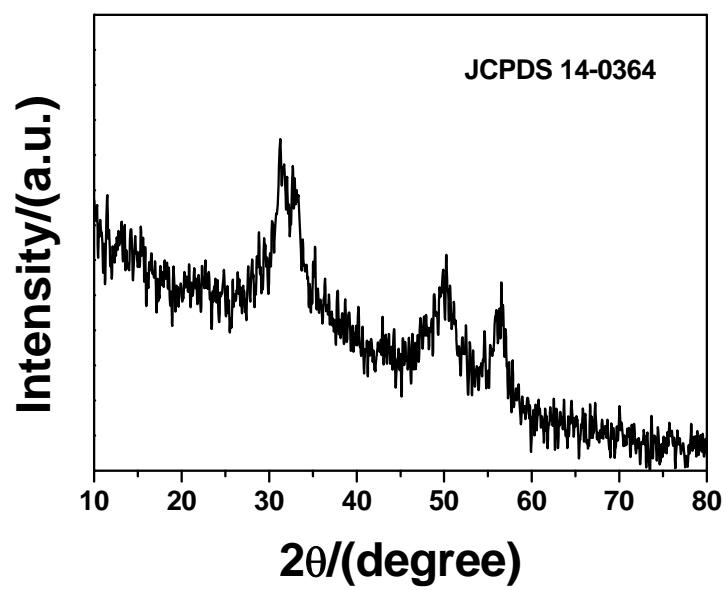

**Fig. S4** SEM images of the samples prepared under different Ni/S molar ratios: (a) 1:1; (b) 1:2; In all cases, samples were prepared at 180 °C, and a reaction time of 12 h.

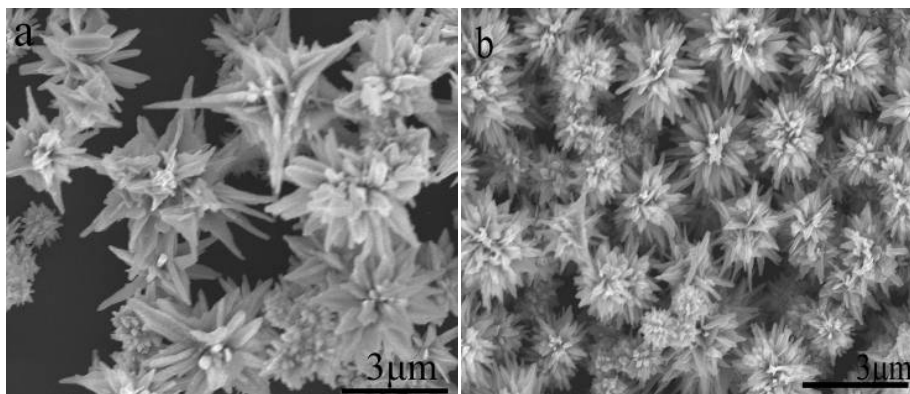

Supplement: b916866d.pdf [file b916866d.pdf]
